# Supplementary material
Source: MDPI journal article supplement (https://www.mdpi.com/2227-9717/9/7/1094)
Supplement: s1 [file s1 › processes-1268360-supplementary.pdf]

# **Synthesis of A Benzothiadiazole-Based D-A Molecule with Aggregation-induced Emission and Controlled Assembly Properties**

*Songhua Chen,<sup>1,\*</sup> Yongqi Liu,<sup>1</sup> Meiyun He<sup>1</sup> and Jianhua Huang<sup>2,\*</sup>*

*<sup>1</sup> College of Chemistry and Material Science, Longyan University, Longyan, 364000, P. R. China.*

*<sup>2</sup> College of Materials Science and Engineering, Huaqiao University, Xiamen, 361021, P. R. China.*

## Materials and synthesis

All reagents and reactants were purchased commercially and used directly without further purification unless otherwise stated. Tetrahydrofuran and toluene were distilled freshly from sodium/benzophenone ketyl under N<sub>2</sub> before use. Compound **3** was synthesized according to previous reports (*Tetrahedron*, **2008**, 64, 8716-8720)

## Supporting Figure

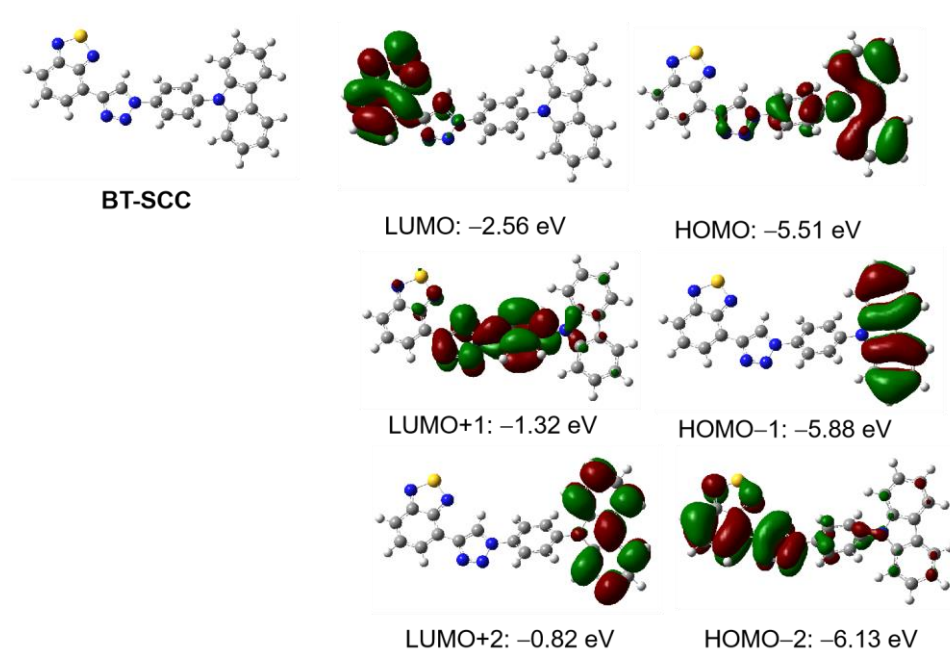

Figure S1. Frontier molecular orbitals of **BT-SCC** calculated by B3LYP/6-31G (d) level of theory
